# Supplementary material
Source: PubMed Central journal article supplement (PMC2928634)
Supplement: 00318.2009_1.pdf [file 00318.2009_1.pdf]

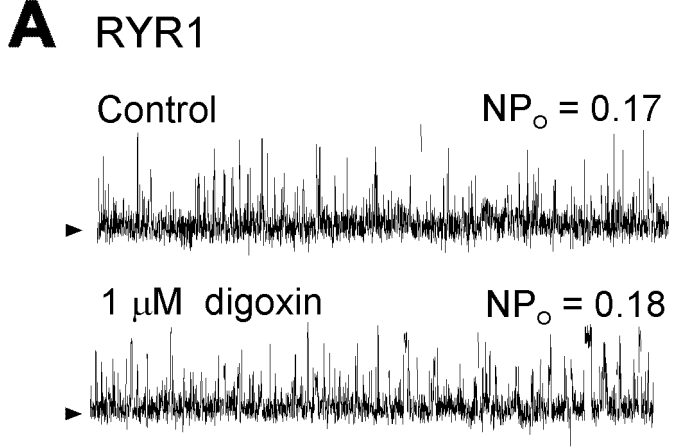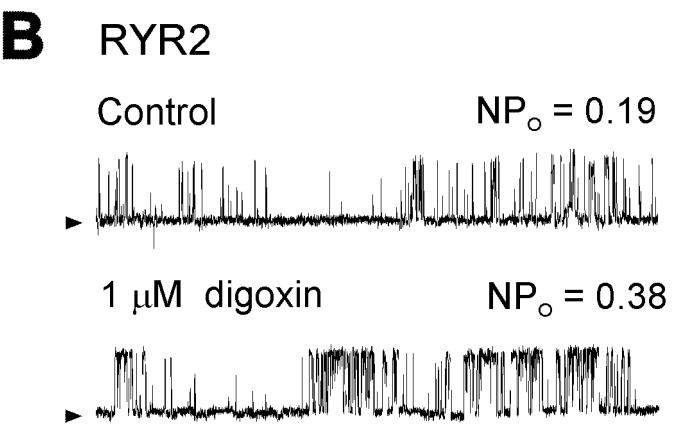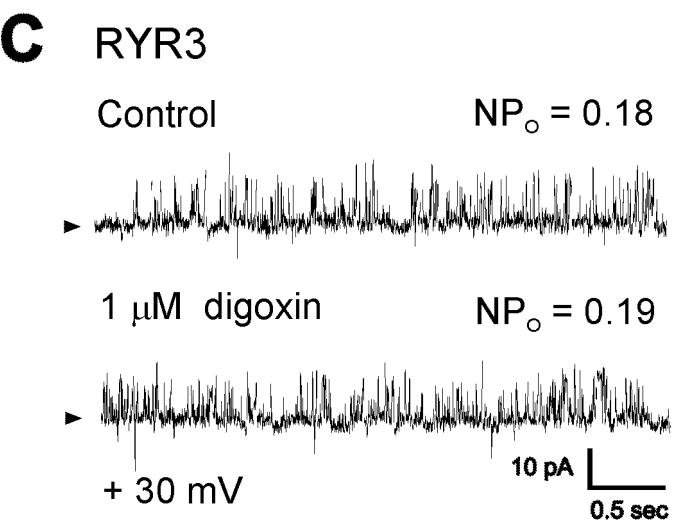

Figure S1

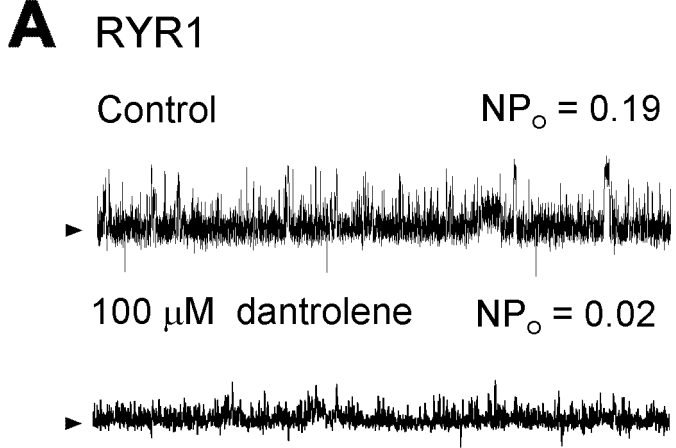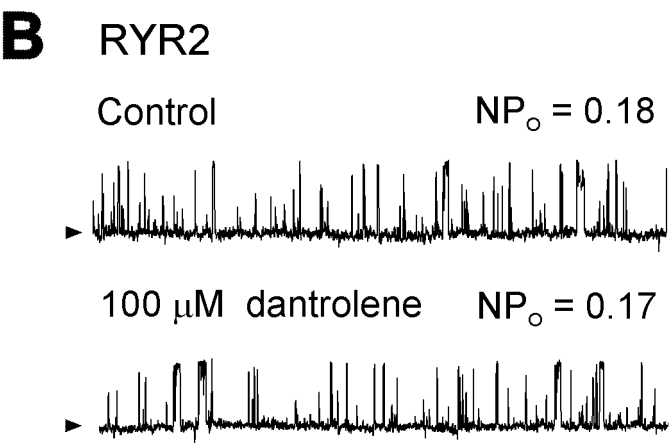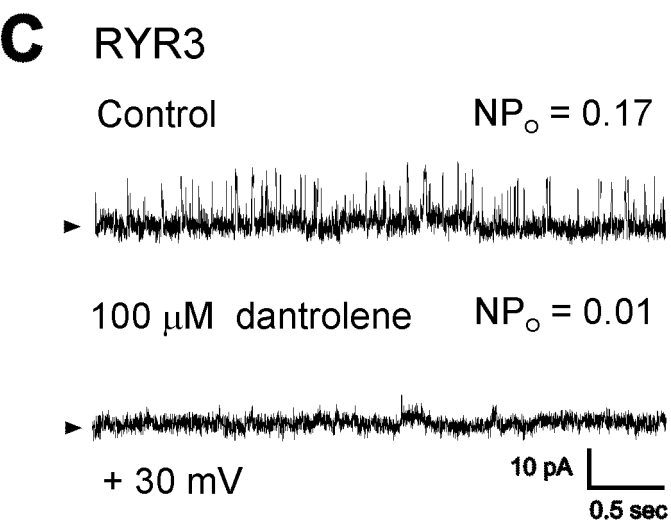

Figure S2

**Online Supplementary Material: captions for figures S1 and S2.**

**Fig. S1. Digoxin potentiates recombinant homomeric RyR2 steady-state ( $NP_o$ ) activity while failing to do potentiate homomeric RyR1 and RyR3 after channel reconstitution into lipid bilayers.** Application of 1  $\mu$ M digoxin to the bilayer *cis* side increased homomeric RyR2  $NP_o$ , which reached 200% of control (**B**) while failing to increase the activity of RyR1 (**A**) and RyR3 (**C**) homomeric channels. Recombinant channel proteins were expressed and reconstituted as described in Materials and Methods. Arrowheads on the left of each trace point to the baseline (nonconducting channel states).

**Fig. S2. Dantrolene drastically reduces the activity ( $NP_o$ ) of recombinant homomeric RyR1 or RyR3 channels while failing to reduce homomeric RyR2  $NP_o$  following channel reconstitution into lipid bilayers.** Application of 100  $\mu$ M dantrolene to the bilayer *cis* side almost totally blunts the activity of homomeric RyR1 (**A**) and RyR3 (**C**)  $NP_o$ , but failed to blunt homomeric RyR2 activity (**B**). Recombinant channel proteins were expressed and reconstituted as described in Materials and Methods. Arrowheads on the left of each trace point to the baseline (nonconducting channel states).
